1 **Rare modification in the ergosterol biosynthesis pathway leads to amphotericin B**  
2 **resistance in *Candida auris* clinical isolates**

3  
4 Milena Kordalewska,<sup>a,#</sup> Kevin D. Guerrero,<sup>a</sup> Timothy D. Mikulski,<sup>a</sup> Tony N. Elias,<sup>a</sup> Rocio  
5 Garcia-Rubio,<sup>a</sup> Indira Berrio,<sup>b,c</sup> Dianne Gardam,<sup>d</sup> Christopher H. Heath,<sup>d,e,f,g</sup> Anuradha  
6 Chowdhary,<sup>h</sup> Nelesh P. Govender,<sup>i,j,h</sup> David S. Perlin<sup>a</sup>

7  
8 <sup>a</sup> Center for Discovery and Innovation, Hackensack Meridian Health, Nutley, NJ, USA

9 <sup>b</sup> Medical and Experimental Mycology Group, Corporación para Investigaciones Biológicas  
10 (CIB), Medellín, Colombia

11 <sup>c</sup> Hospital general de Medellín “Luz Castro de Gutiérrez” ESE, Medellín, Colombia

12 <sup>d</sup> Department of Microbiology, PathWest Laboratory Medicine FSH Network, Fiona Stanley  
13 Hospital, Murdoch, Western Australia (WA), Australia

14 <sup>e</sup> Department of Infectious Diseases, Fiona Stanley Hospital, Murdoch, Australia

15 <sup>f</sup> Infectious Diseases, Royal Perth Hospital, Perth, WA, Australia

16 <sup>g</sup> Faculty of Health & Medical Sciences, University of Western Australia, Crawley, WA,  
17 Australia

18 <sup>h</sup> Medical Mycology Unit, Department of Microbiology, Vallabhbhai Patel Chest Institute,  
19 University of Delhi, Delhi, India

20 <sup>i</sup> Centre for Healthcare-Associated Infections, Antimicrobial Resistance and Mycoses, National  
21 Institute for Communicable Diseases, a Division of the National Health Laboratory Service,  
22 Sandringham 2131, South Africa

23 <sup>j</sup> School of Pathology, Faculty of Health Sciences, University of the Witwatersrand, Parktown  
24 2193, South Africa

25 <sup>h</sup> MRC Centre for Medical Mycology, University of Exeter, Exeter, EX4 4PY, United Kingdom

26

27 **Running Head:** *Candida auris* amphotericin B resistance

28

29 #Address correspondence to Milena Kordalewska, [milena.kordalewska@hnh-cdi.org](mailto:milena.kordalewska@hnh-cdi.org)

30

31 Abstract: 75 words

32 Text: 1268 words

33 **ABSTRACT**

34 We determined amphotericin B (AmB) susceptibility and sequenced key genes of the ergosterol  
35 biosynthesis pathway implicated in AmB resistance (*ERG2*, *ERG3*, *ERG6*, *ERG11*) of 321  
36 clinical isolates of *Candida auris*. In antifungal susceptibility testing, 19 (5.9%) isolates were  
37 categorized as AmB-resistant (MIC  $\geq$ 2 mg/l). Only one AmB-resistant isolate presented a unique  
38 non-wild-type *ERG6* genotype that was confirmed to confer amphotericin B resistance (MIC >32  
39 mg/l) when introduced into a susceptible strain (MIC = 0.5 mg/l).

40 Amphotericin B (AmB), a polyene antifungal drug, has a broad-spectrum activity against  
41 pathogenic fungi, including *Candida* spp. (1). Its mode of action is rather unusual, as it does not  
42 inhibit an enzyme. Instead, AmB binds to ergosterol (ERG) (2), an abundant sterol that regulates  
43 permeability and fluidity of the fungal cell membrane (3). In most *Candida* species, AmB  
44 resistance is rare in comparison to resistance to other antifungal drug classes (azoles and  
45 echinocandins) (4). Most often, AmB resistance stems from alterations in the sterol composition  
46 of the fungal cell membrane due to mutations in genes of the ERG biosynthesis pathway. Whole  
47 genome sequence (WGS) analysis of AmB-resistant clinical isolates revealed a transposon  
48 insertion in *ERG2* (C-8 sterol isomerase) of *C. albicans*, while a missense mutation in *ERG3* (C-5  
49 sterol desaturase) and deletion of 170 nucleotides in *ERG11* (lanosterol 14 $\alpha$ -demethylase) were  
50 detected in *C. tropicalis* (4). Moreover, a single AmB-resistant *C. albicans* isolate was reported  
51 to harbor a substitution in *ERG11* and a sequence repetition (10 duplicated amino acids) leading  
52 to loss of function of *ERG5* (C-22 sterol desaturase) (5). In *C. glabrata* clinical isolates, targeted  
53 gene sequencing revealed the presence of AmB resistance-conferring mutations in *ERG2* and  
54 *ERG6* (C-24 sterol methyltransferase) (6-8). Additionally, *in vitro* evolution experiments  
55 confirmed the role of *ERG6* mutations in AmB resistance in *C. albicans* (4).

56 Clinical isolates of *C. auris*, a recently emerged nosocomial pathogen, were reported to have a  
57 higher prevalence of AmB resistance (based on tentative breakpoints), e.g., 30% in the U.S. (9).  
58 In contrast to relatively well-studied mechanisms of azole and echinocandin resistance (10-16),  
59 information about *C. auris* response to AmB is scarce. So far, suggestions for an underlying  
60 mechanism of AmB resistance in *C. auris* have come from WGS analysis. The researchers did  
61 not find any loss-of-function mutations in genes previously implicated in AmB resistance in *C.*  
62 *albicans* but listed various genes with non-synonymous mutations which may potentially play a

63 role (17, 18). However, no follow-up studies (e.g., targeted gene sequencing, genetic engineering)  
64 were reported to confirm these observations.

65 The current antifungal armamentarium is extremely limited, with only three classes of systemic  
66 drugs widely available to treat *Candida* spp. infections. Antifungal treatment of *C. auris*  
67 infections is further complicated by several factors, including the scale of azole resistance (e.g.  
68 90% of *C. auris* isolates in the U.S. are fluconazole-resistant) (9), emergence of multidrug  
69 resistance involving two or more drug classes (19, 20), and scarce availability of first-line therapy  
70 drugs, echinocandins, in resource-limited countries (21). Thus, a better understanding of the scale  
71 and molecular mechanism of AmB resistance in *C. auris* is urgently needed.

72 Here, we analyzed distribution of AmB minimal inhibitory concentration (MIC) values for 321  
73 clinical isolates of *C. auris* representing five clades (I – South Asian, n=48; II – East Asian, n=6;  
74 III – South African, n=30; IV – South American, n=236; V – Iranian, n=1). Antifungal  
75 susceptibility testing (AFST) with AmB was performed with Etest gradient diffusion strips  
76 (bioMérieux, Marcy-l'Étoile, France) according to the manufacturer's instructions. As  
77 recommended by the Centers for Disease Control and Prevention (CDC), MICs of 1.5 mg/l were  
78 rounded up to 2 mg/l. A tentative AmB MIC breakpoint of  $\geq 2$  mg/l, determined by the CDC on  
79 the basis of pharmacokinetic/pharmacodynamic study results (murine model of *C. auris*  
80 infection), was used to categorize isolates as resistant to AmB (9). A summary of AFST results  
81 and MIC values for individual isolates are presented in Table 1 and Supplementary Table 1,  
82 respectively. Three hundred and two isolates (94.1%) exhibited AmB MIC values  $< 2$  mg/l and  
83 were categorized as AmB-susceptible. A total of 19 isolates (5.9%), including 3 isolates of clade  
84 I, 1 isolate of clade III, and 15 isolates of clade IV, exhibited AmB MIC values  $\geq 2$  mg/l and  
85 therefore were categorized as AmB-resistant (Table 1). This rate is similar to the one reported  
86 recently from South Africa (6%) (16), but considerably lower than majority of the studies

87 conducted so far, where anywhere from 10% to 35% of isolates (30% of U.S. isolates according  
88 to the CDC) were reported as AmB-resistant (9, 22-24).

89 To decipher the molecular resistance mechanism in isolates exhibiting elevated MIC values ( $\geq$   
90 mg/l), we amplified and sequenced the following genes of ergosterol biosynthesis pathway (in the  
91 entire collection of clinical isolates): *ERG2* (C-8 sterol isomerase; B9J08\_004943), *ERG3* (C-5  
92 sterol desaturase; B9J08\_003737), *ERG6* (sterol 24-C-methyltransferase; B9J08\_005340), and  
93 *ERG11* (lanosterol 14- $\alpha$ -demethylase; B9J08\_001448), which were previously implicated in  
94 AmB resistance in other *Candida* spp. Gene sequences of *C. auris* strain B8441 extracted from  
95 FungiDB ([fungidb.org](http://fungidb.org)) served as a reference for primer design (Supplementary Material 2) and  
96 sequence analysis. Primers were synthesized by Integrated DNA Technologies (Coralville, IA,  
97 United States), and Sanger sequencing was performed by Genewiz (South Plainfield, NJ, United  
98 States). A summary of sequencing results and genotypes of individual isolates are presented in  
99 Table 1 and Supplementary Table 1, respectively. In 18 of 19 AmB-resistant isolates no  
100 mutations in *ERG2*, *ERG3*, *ERG6*, or *ERG11* were found that could explain elevated AmB values  
101 (Table 1). We noticed that amplification of *ERG6* from one South African isolate (SA18, clade  
102 III; AmB MIC = 6 mg/l) yielded a much shorter PCR product (Figure 1). Sequence analysis  
103 revealed that this isolate presented a unique non-wild-type *ERG6* genotype where 492 base pairs  
104 (from 52 to 543) were deleted (SA18's *ERG6* is 636 bp long in comparison to the wild-type's  
105 (WT's) 1128 bp), which corresponds to the deletion of 164 amino acids (from 18 to 181) and a  
106 shorter Erg6 (SA18's Erg6 is 211 amino acids long in comparison to the 375 AA of WT) (Figure  
107 2). Representative sequences were deposited at GeneBank (NCBI) with the accession numbers  
108 OK564516 - OK564551 (*ERG2*), OK564552 - OK564587 (*ERG3*), OK564588 - OK564623  
109 (*ERG6*), and OK564624 - OK564654 (*ERG11*). Accession numbers for individual isolates are  
110 presented in Supplementary Table 1.

111 To confirm that the SA18's *ERG6* variant confers AmB resistance, a WT *ERG6* gene in AmB-  
112 susceptible (MIC = 0.5 mg/l) isolate VPCI 717/P/14 (clade I) was replaced with an *ERG6* of  
113 SA18 fused with nourseothricin (NAT) resistance gene by using CRISPR/Cas9 system as  
114 described before (25), except that the cells were made electrocompetent with the Frozen-EZ yeast  
115 transformation kit (Zymo Research, Irvine, CA, USA). The transformants were selected on YPD  
116 plates containing 300 mg/l NAT. Correctness of transformation was validated by PCR and  
117 sequencing. All PCR conditions, reagents and primers used are listed in Supplementary Material  
118 2. After that, the AmB MIC of the correct transformant (MKKG066) was determined by Etest.  
119 MIC >32 mg/l (no zone of inhibition around the Etest strip) was read, indicating that  
120 amphotericin B resistance was induced when a wild-type *ERG6* was replaced with *ERG6* of  
121 SA18 in a susceptible strain.

122 *ERG6* encodes C-24 methyltransferase, which converts zymosterol to fecosterol in the ERG  
123 biosynthesis pathway. In *C. albicans*, a fragment between amino acids 127 and 135 of Erg6 is a  
124 highly conserved S-adenosylmethionine binding site (26). This fragment (amino acids 128-136 in  
125 Erg6 of *C. auris*) is not present in SA18's Erg6 due to the deletion of amino acids 18-181 (Figure  
126 2). It was previously shown that lack of Erg6 activity leads to the accumulation of zymosterol,  
127 which can support fungal cell growth, but the absence of ergosterol in the cell membrane confers  
128 AmB resistance (6).

129 In conclusion, we found that mutations in key genes of ergosterol biosynthesis, which can be  
130 linked directly to AmB resistance, are extremely rare. Only 1 of 313 clinical isolates screened  
131 (0.3%) had an *ERG6* variant which induced AmB resistance in a WT strain. It is possible that  
132 mechanisms other than *ERG6* mutations may also contribute to reduced AmB susceptibility in *C.*  
133 *auris*, although this remains to be determined.

134

135 **ACKNOWLEDGEMENTS**

136 D.S.P. receives funding from the U.S. National Institutes of Health (NIH) and contracts with  
137 Merck, Regeneron and Pfizer. He serves on advisory boards for Amplyx, Astellas, Cidara,  
138 Matinas, N8 Medical and Scynexis. N.P.G. receives funding from the NIH, the U.S. Centers for  
139 Disease Control and Prevention (CDC), the U.K. Medical Research Council (MRC), and Gates  
140 Foundation. The remaining authors declare that the research was conducted in the absence of any  
141 commercial or financial relationships that could be construed as a potential conflict of interest.

142

143 **REFERENCES**

- 144 1. Chandrasekar P. 2011. Management of invasive fungal infections: a role for polyenes. *J*  
145 *Antimicrob Chemother* 66:457-65.
- 146 2. Carolus H, Pierson S, Lagrou K, Van Dijck P. 2020. Amphotericin B and Other Polyenes-  
147 *Discovery, Clinical Use, Mode of Action and Drug Resistance. J Fungi (Basel)* 6.
- 148 3. Douglas LM, Konopka JB. 2014. Fungal membrane organization: the eisosome concept.  
149 *Annu Rev Microbiol* 68:377-93.
- 150 4. Vincent BM, Lancaster AK, Scherz-Shouval R, Whitesell L, Lindquist S. 2013. Fitness  
151 trade-offs restrict the evolution of resistance to amphotericin B. *PLoS Biol* 11:e1001692.
- 152 5. Martel CM, Parker JE, Bader O, Weig M, Gross U, Warrilow AG, Kelly DE, Kelly SL.  
153 2010. A clinical isolate of *Candida albicans* with mutations in ERG11 (encoding sterol  
154 14alpha-demethylase) and ERG5 (encoding C22 desaturase) is cross resistant to azoles  
155 and amphotericin B. *Antimicrob Agents Chemother* 54:3578-83.
- 156 6. Ahmad S, Joseph L, Parker JE, Asadzadeh M, Kelly SL, Meis JF, Khan Z. 2019. ERG6  
157 and ERG2 Are Major Targets Conferring Reduced Susceptibility to Amphotericin B in  
158 Clinical *Candida glabrata* Isolates in Kuwait. *Antimicrob Agents Chemother* 63.



- 159 7. Vandeputte P, Tronchin G, Larcher G, Ernoult E, Berges T, Chabasse D, Bouchara JP.  
160 2008. A nonsense mutation in the ERG6 gene leads to reduced susceptibility to polyenes  
161 in a clinical isolate of *Candida glabrata*. *Antimicrob Agents Chemother* 52:3701-9.
- 162 8. Vandeputte P, Tronchin G, Berges T, Hennequin C, Chabasse D, Bouchara JP. 2007.  
163 Reduced susceptibility to polyenes associated with a missense mutation in the ERG6 gene  
164 in a clinical isolate of *Candida glabrata* with pseudohyphal growth. *Antimicrob Agents*  
165 *Chemother* 51:982-90.
- 166 9. Centers for Disease Control and Prevention. 05/29/2021. Antifungal Susceptibility  
167 Testing and Interpretation. [https://www.cdc.gov/fungal/candida-auris/c-auris-](https://www.cdc.gov/fungal/candida-auris/c-auris-antifungal.html)  
168 [antifungal.html](https://www.cdc.gov/fungal/candida-auris/c-auris-antifungal.html). Accessed 08/03/2021.
- 169 10. Chowdhary A, Prakash A, Sharma C, Kordalewska M, Kumar A, Sarma S, Tarai B, Singh  
170 A, Upadhyaya G, Upadhyay S, Yadav P, Singh PK, Khillan V, Sachdeva N, Perlin DS,  
171 Meis JF. 2018. A multicentre study of antifungal susceptibility patterns among 350  
172 *Candida auris* isolates (2009-17) in India: role of the ERG11 and FKS1 genes in azole and  
173 echinocandin resistance. *J Antimicrob Chemother* 73:891-899.
- 174 11. Healey KR, Kordalewska M, Jimenez Ortigosa C, Singh A, Berrio I, Chowdhary A,  
175 Perlin DS. 2018. Limited ERG11 Mutations Identified in Isolates of *Candida auris*  
176 Directly Contribute to Reduced Azole Susceptibility. *Antimicrob Agents Chemother* 62.
- 177 12. Kordalewska M, Lee A, Park S, Berrio I, Chowdhary A, Zhao Y, Perlin DS. 2018.  
178 Understanding Echinocandin Resistance in the Emerging Pathogen *Candida auris*.  
179 *Antimicrob Agents Chemother* 62.
- 180 13. Rybak JM, Doorley LA, Nishimoto AT, Barker KS, Palmer GE, Rogers PD. 2019.  
181 Abrogation of Triazole Resistance upon Deletion of CDR1 in a Clinical Isolate of  
182 *Candida auris*. *Antimicrob Agents Chemother* 63.

- 183 14. Rybak JM, Munoz JF, Barker KS, Parker JE, Esquivel BD, Berkow EL, Lockhart SR,  
184 Gade L, Palmer GE, White TC, Kelly SL, Cuomo CA, Rogers PD. 2020. Mutations in  
185 TAC1B: a Novel Genetic Determinant of Clinical Fluconazole Resistance in *Candida*  
186 *auris*. *mBio* 11.
- 187 15. Li J, Coste AT, Liechti M, Bachmann D, Sanglard D, Lamothe F. 2021. Novel ERG11 and  
188 TAC1b mutations associated with azole resistance in *Candida auris*. *Antimicrob Agents*  
189 *Chemother* doi:10.1128/AAC.02663-20.
- 190 16. Maphanga TG, Naicker SD, Kwenda S, Munoz JF, van Schalkwyk E, Wadula J, Nana T,  
191 Ismail A, Coetzee J, Govind C, Mtshali PS, Mpembe RS, Govender NP, for G-S. 2021. In  
192 Vitro Antifungal Resistance of *Candida auris* Isolates from Bloodstream Infections, South  
193 Africa. *Antimicrob Agents Chemother* 65:e0051721.
- 194 17. Escandon P, Chow NA, Caceres DH, Gade L, Berkow EL, Armstrong P, Rivera S, Misas  
195 E, Duarte C, Moulton-Meissner H, Welsh RM, Parra C, Pescador LA, Villalobos N,  
196 Salcedo S, Berrio I, Varon C, Espinosa-Bode A, Lockhart SR, Jackson BR, Litvintseva  
197 AP, Beltran M, Chiller TM. 2019. Molecular Epidemiology of *Candida auris* in Colombia  
198 Reveals a Highly Related, Countrywide Colonization With Regional Patterns in  
199 Amphotericin B Resistance. *Clin Infect Dis* 68:15-21.
- 200 18. Munoz JF, Gade L, Chow NA, Loparev VN, Juieng P, Berkow EL, Farrer RA,  
201 Litvintseva AP, Cuomo CA. 2018. Genomic insights into multidrug-resistance, mating  
202 and virulence in *Candida auris* and related emerging species. *Nat Commun* 9:5346.
- 203 19. Lyman M, Forsberg K, Reuben J, Dang T, Free R, Seagle EE, Sexton DJ, Soda E, Jones  
204 H, Hawkins D, Anderson A, Bassett J, Lockhart SR, Merengwa E, Iyengar P, Jackson  
205 BR, Chiller T. 2021. Notes from the Field: Transmission of Pan-Resistant and

- 206 Echinocandin-Resistant *Candida auris* in Health Care Facilities - Texas and the District of  
207 Columbia, January-April 2021. *MMWR Morb Mortal Wkly Rep* 70:1022-1023.
- 208 20. Ostrowsky B, Greenko J, Adams E, Quinn M, O'Brien B, Chaturvedi V, Berkow E,  
209 Vallabhaneni S, Forsberg K, Chaturvedi S, Lutterloh E, Blog D, Group CaIW. 2020.  
210 *Candida auris* Isolates Resistant to Three Classes of Antifungal Medications - New York,  
211 2019. *MMWR Morb Mortal Wkly Rep* 69:6-9.
- 212 21. Mukkada S, Kirby J, Apiwattanakul N, Hayden RT, Caniza MA. 2016. Use of Fungal  
213 Diagnostics and Therapy in Pediatric Cancer Patients in Resource-Limited Settings. *Curr*  
214 *Clin Microbiol Rep* 3:120-131.
- 215 22. Lockhart SR, Etienne KA, Vallabhaneni S, Farooqi J, Chowdhary A, Govender NP,  
216 Colombo AL, Calvo B, Cuomo CA, Desjardins CA, Berkow EL, Castanheira M, Magobo  
217 RE, Jabeen K, Asghar RJ, Meis JF, Jackson B, Chiller T, Litvintseva AP. 2017.  
218 Simultaneous Emergence of Multidrug-Resistant *Candida auris* on 3 Continents  
219 Confirmed by Whole-Genome Sequencing and Epidemiological Analyses. *Clin Infect Dis*  
220 64:134-140.
- 221 23. Osei Sekyere J. 2018. *Candida auris*: A systematic review and meta-analysis of current  
222 updates on an emerging multidrug-resistant pathogen. *Microbiologyopen* 7:e00578.
- 223 24. Frias-De-Leon MG, Hernandez-Castro R, Vite-Garin T, Arenas R, Bonifaz A, Castanon-  
224 Olivares L, Acosta-Altamirano G, Martinez-Herrera E. 2020. Antifungal Resistance in  
225 *Candida auris*: Molecular Determinants. *Antibiotics (Basel)* 9.
- 226 25. Grahl N, Demers EG, Crocker AW, Hogan DA. 2017. Use of RNA-Protein Complexes  
227 for Genome Editing in Non-*albicans* *Candida* Species. *mSphere* 2.
- 228 26. Jensen-Pergakes KL, Kennedy MA, Lees ND, Barbuch R, Koegel C, Bard M. 1998.  
229 Sequencing, disruption, and characterization of the *Candida albicans* sterol

230 methyltransferase (ERG6) gene: drug susceptibility studies in erg6 mutants. Antimicrob  
231 Agents Chemother 42:1160-7.

232

233 **Table 1.** Results of AFST and gene sequencing performed for 321 *C. auris* isolates belonging to  
 234 five geographic clades: I – South Asian (n=48); II – East Asian (n=6); III – South African (n=30);  
 235 IV – South American (n=236); V – Iranian (n=1).

236 AmB – amphotericin B; MIC – minimal inhibitory concentration

237 \* The actual range is 1.5-2 mg/l, but all AmB MIC values of 1.5 mg/l obtained by Etest were  
 238 rounded up to 2, as recommended by the CDC.

239 \*\* K177R/N335S/E343D – present in all isolates of clade IV

| Clade      | Number of isolates | AmB MIC range [mg/l] | Erg2 | Erg3           | Erg6                  | Erg11                                          |
|------------|--------------------|----------------------|------|----------------|-----------------------|------------------------------------------------|
| <b>I</b>   | 45                 | 0.19 - 1             | WT   | WT             | WT                    | WT; Y132F; K143R                               |
|            | 3 (6.3%)           | 2*                   | WT   | WT             | WT                    | Y132F                                          |
| <b>II</b>  | 6                  | 0.094 - 0.5          | D39E | WT             | WT                    | WT                                             |
|            | 0                  | ≥2                   | -    | -              | -                     | -                                              |
| <b>III</b> | 29                 | 0.19 - 0.38          | D39E | WT             | WT                    | V125A/F126L                                    |
|            | 1 (3.3%)           | 6                    | D39E | WT             | deletion of AA 18-181 | V125A/F126L                                    |
| <b>IV</b>  | 221                | 0.25 - 1             | D39E | S58T           | WT                    | WT**; E102K; Y132F; K143R; G459S; I466M; Y501H |
|            | 15 (6.4%)          | 2*                   | D39E | S58T           | WT                    | WT**                                           |
| <b>V</b>   | 1                  | 0.19                 | WT   | I31V/S37N/L63M | A287T                 | K177R/N335S/E343D/T366I                        |
|            | 0                  | ≥2                   | -    | -              | -                     | -                                              |

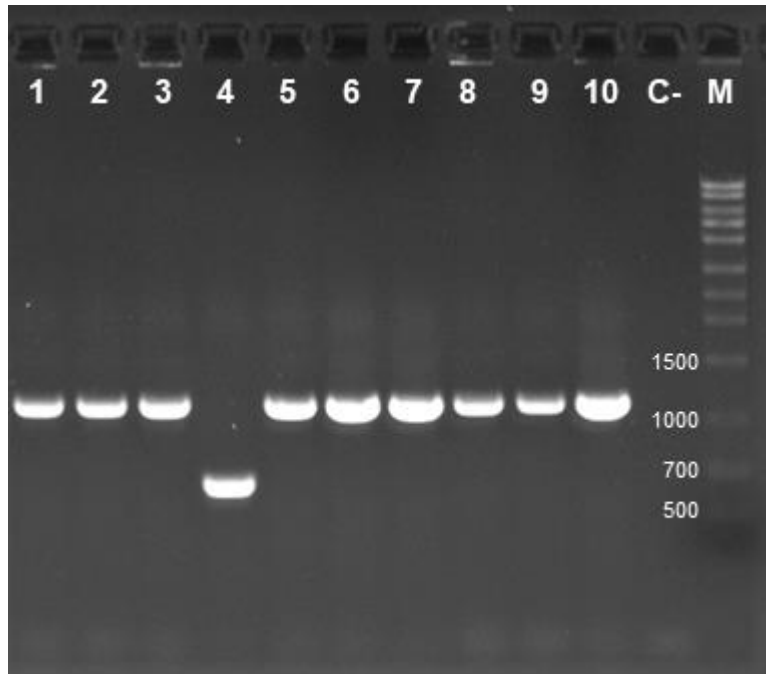

240

241 **Figure 1.** Results of PCR amplification of *ERG6* gene from *C. auris* clinical isolates SA15-SA24  
242 (lanes 1-10).

243 C-, negative control; M: molecular size marker

|           |                                                                                                                     |     |
|-----------|---------------------------------------------------------------------------------------------------------------------|-----|
| Calbicans | -MSPVQLAEKNYERDEQFTKALHGESYKKTGLSALI A KSKDAASVAAEGYFKHWDGGISK                                                      | 59  |
| Cauris    | MSSTVPLA EKDHARDQEF AKALHGNSYKKTGLGALMSKSKDAADV ANNGYFKHWDGGVTE                                                     | 60  |
|           | * * * * * ; : * * : : * * * * * ; * * * * * ; * * : * * * * * ; * * : * * * * * ; : : *                             |     |
| Calbicans | DDEEKRLNDYSQLTHHYNLV TDFYEY GWSSFHFSRYKGEAFRQATARHEHFLAHKMN                                                         | 119 |
| Cauris    | EDEKKRLGDYSQLTSHYYNLV TDFYEY GWSSFHFSRYRGEAFRQATARHEHFLAYKMG                                                        | 120 |
|           | : * * ; * * ; * * * * * * * * * * * * * * * * * * * * * * * * * * * * * * * * * * * * ; : * * ; * * ;               |     |
| Calbicans | LNENMKVL DVGCGVGGPGREITRF TDC EIVGLNNNDYQIERANHYAKKYHLDHKLSYVKG                                                     | 179 |
| Cauris    | LTEDMKVL DVGCGVGGPGREICRF TDC TIVGLNNNDYQIERANHYAKKYHLDKLSYVKG                                                      | 180 |
|           | * , * ; * * * * * * * * * * * * * * * * * * * * * * * * * * * * * * * * * * * * ; * * * * * * * * * * * * * * * * ; |     |
| Calbicans | DFMQMDFEPESFDVYAIEATVHAPVLEGVYSEIYKVLKPGGVFGVYEWMTDKYDETNE                                                          | 239 |
| Cauris    | DFMQMDFEPESFDVYAIEATVHAPVLEGVYSEIYRVLKPGGVFGVYEWMTDKYDESNE                                                          | 240 |
|           | * * * * * * * * * * * * * * * * * * * * * * * * * * * * * * * * * * * * ; * * * * * * * * * * * * * * * * ;         |     |
| Calbicans | EHRKIAYGIEVDGIPKMYSRKVAEQALKNVGF EIEYQKDLADVDEIPWYYPLSGDLKF                                                         | 299 |
| Cauris    | EHRKIAYGIEVDGIPKMYKRDVAEQALKNVGF EIEYQKDLAAADDEIPWYYPLSGQFKY                                                        | 300 |
|           | * * * * * * * * * * * * * , * * * * * * * * * * * * * * * * * * * * * * * * ; * * * * * * * * * * * * ;             |     |
| Calbicans | CQTFGDYLT VFRTRSIRGRFITTESVGLMEKIGLAPKGSQVTHALEDAAVNLVEGGRQKL                                                       | 359 |
| Cauris    | VQTLGDYFTVFRTRSIRGRTVTTEL VGLMEKIGLAPKGSQVGALEDAAVNLVKGGEQKL                                                        | 360 |
|           | * * ; * * ; * * * * * * * * * * * * * * * * * * * * * * * * * * * * * * * * * * * * ; * * ; * * ;                   |     |
| Calbicans | FTPMMLYVVRKPLEKKD*                                                                                                  | 376 |
| Cauris    | FTPMMLYVVRKPKNA---                                                                                                  | 375 |
|           | * * * * * * * * * * * * * * * * * * * * * * * * * * * * * * * * * * * * ;                                           |     |

← → Deletion present in SA18       conserved S-adenosylmethionine binding site

244

245 **Figure 2.** Alignment of Erg6 sequence from *Candida albicans* and *C. auris*.
